# Supplementary material
Source: publisher figshare collection journal article supplement (https://acs.figshare.com/ndownloader/files/3796420)
Supplement: Supplementary file 1 [file 3796420]

# Supporting Information

## Assembly of Selective Biomimetic Surface on an Electrode Surface: A Design of Nano–Bio Interface for Biosensing

Tao Gao,<sup>†</sup> Fengzhen Liu,<sup>‡</sup> Dawei Yang,<sup>†</sup> Yue Yu,<sup>§</sup> Zhaoxia Wang,<sup>‡</sup> Genxi Li<sup>\*,†,//</sup>

<sup>†</sup>State Key Laboratory of Pharmaceutical Biotechnology, Department of Biochemistry, Nanjing University, Nanjing 210093, People's Republic of China

<sup>‡</sup>Department of Oncology, The Second Affiliated Hospital of Nanjing Medical University, Nanjing 210011, People's Republic of China

<sup>§</sup>Department of Hepatobiliary Surgery, Nanjing Drum Tower Hospital, The Affiliated Hospital of Nanjing University, Nanjing 210008, People's Republic of China

<sup>//</sup>Laboratory of Biosensing Technology, School of Life Sciences, Shanghai University, Shanghai 200444, People's Republic of China

\*Address correspondence to [genxili@nju.edu.cn](mailto:genxili@nju.edu.cn)

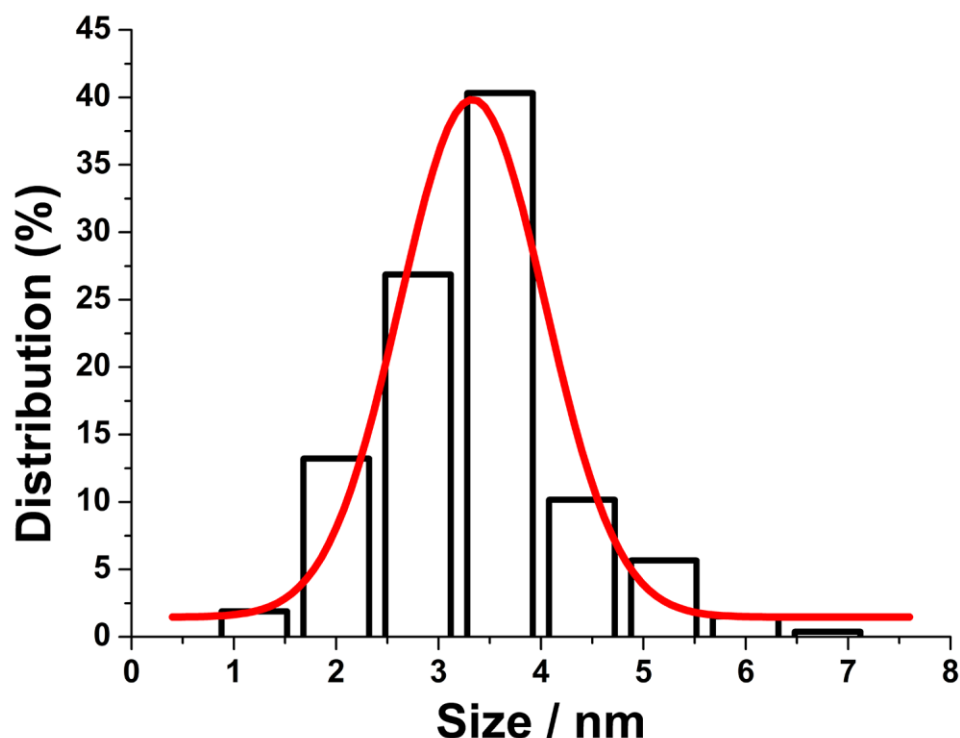

**Figure S1.** Size distribution of the AgNPs anchored on GO sheet, caculated from 300 individual AgNPs with the software of NonaMeasure V1.2.5. The red curve shows the corresponding Gaussian fitting of the size distribution, with a symcenter of 3.3 nm and a FWHM of 1.7 nm.

Chronocoulometry (CC) was used to caculate surface density of E-TBA. A cationic redox molecule,  $[\text{Ru}(\text{NH}_3)_6]^{3+}$  (RuHex), can stoichiometrically bound to the anionic phosphate of DNA strands *via* electrostatic interaction with DNA.<sup>1</sup> RuHex complexes serve as signaling molecules whose cumulative redox charge is a direct function of the amount of DNA strands proximal to the electrode surface.<sup>2</sup> The experiment parameters were as follows: scan rate,  $100 \text{ mV s}^{-1}$ ; pulse period, 250 ms; sample interval, 20 ms. The text solution was 10 mM Tris-HCl, pH 7.4.

In **Figure S2**,  $\Delta Q$  corresponds to RuHex molecules electrostatically bound to surface-confined E-TBA. The surface density of E-TBA ( $\Gamma_{\text{DNA}}$ ) was calculate by using the following equation:  $\Gamma_{\text{DNA}} = (\Delta Q NA / nFA)(z/m)$ , where  $n$  is the number of electrons in the reaction,  $A$  is the area of the working electrode,  $m$  is the number of nucleotides in the DNA,  $z$  is the charge of the redox molecules and  $NA$  is Avogadro's number.<sup>3</sup>

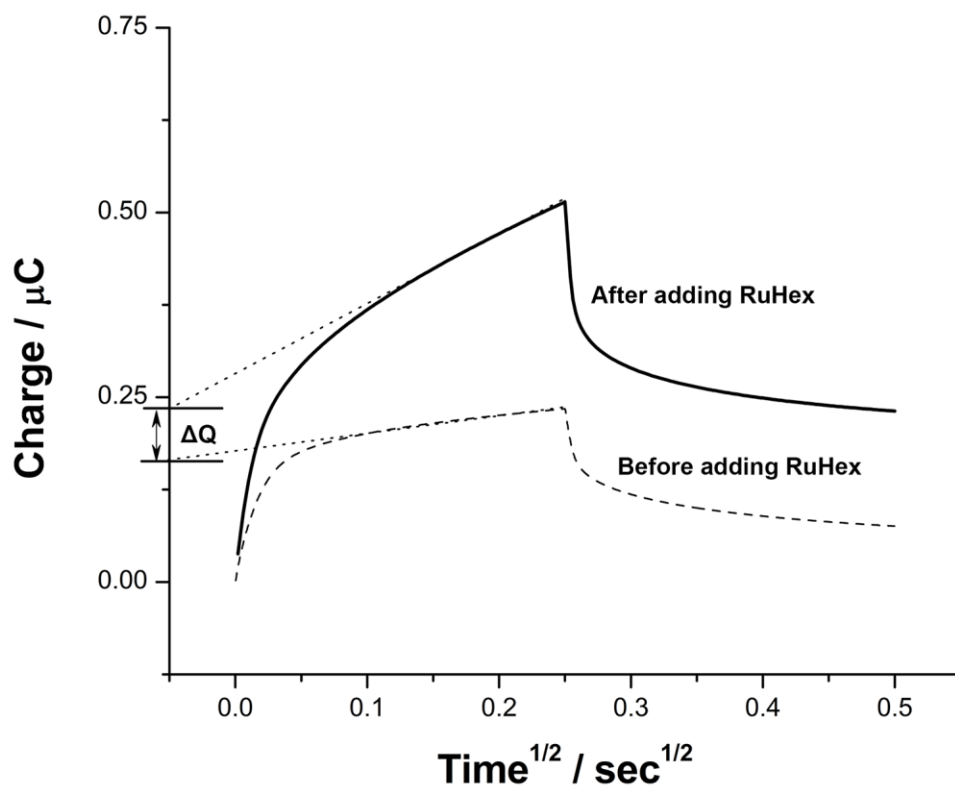

**Figure S2.** Chronocoulometric response curves for E-TBA modified electrode without (dash line) and containing (solid line) 50  $\mu\text{M}$  RuHex.

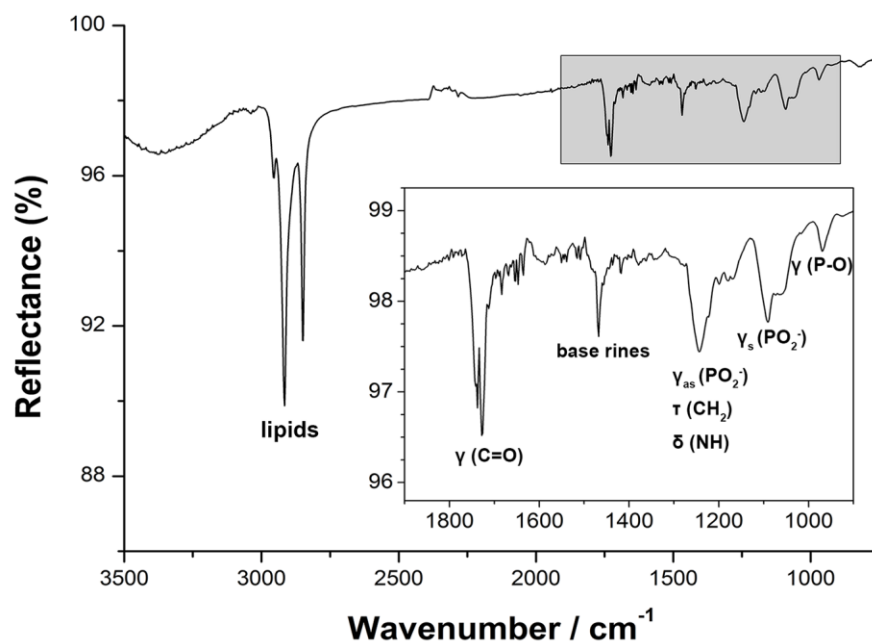

**Figure S3.** The micro-FTIR reflective spectra of the SBMMS on gold electrode surface.

- (1) Ho, P. S.; Frederick, C. A.; Saal, D.; Wang, A. H.; Rich, A. *J. Biomol. Struct. Dyn.* **1987**, 4, 521-534.
- (2) Steel, A. B.; Herne, T. M.; Tarlov, M. J. *Anal. Chem.* **1998**, 70, 4670-4677.
- (3) Zhang, J.; Song, S.; Wang, L.; Pan, D.; Fan, C. *Nat. Protoc.* **2007**, 2, 2888-2895.
